# Supplementary material
Source: publisher figshare collection journal article supplement (https://gsajournals.figshare.com/ndownloader/files/28102734)
Supplement: Supplementary file 1 [file 28102734]

## Sheet: Table S3
Table S3. Means and ranges for best linear unbiased predictors (BLUPs) of 15 fresh kernel elemental phenotypes evaluated in the sweet corn association panel and estimated heritability on a line-mean basis across two years in each of two locations.
			BLUPs
Trait		Lines	Mean	Standard deviation	Range	Heritability on a line-mean basis
			–––––––– μg g-1 dry weight –––––––
Boron	NY	384	1.97	0.13	1.57-2.65	0.19
	WI	349	1.8	0.19	1.28-2.44	0.22
Cadmium	NY	385	0.014	0.006	0.006-0.039	0.59
	WI	366	0.01	0.006	0.003-0.039	0.76
Calcium	NY	367	66.68	8.31	47.93-99.99	0.32
	WI	315	51.19	9.79	27.24-92.64	0.32
Copper	NY	385	3.36	0.65	1.96-6.09	0.63
	WI	366	3.14	0.75	1.81-6.04	0.86
Iron	NY	385	17.73	1.25	14.43-22.26	0.37
	WI	366	19.29	2.26	14.65-29.37	0.61
Magnesium	NY	385	1257.59	51.67	1131.69-1425.06	0.57
	WI	366	1275.64	74.5	1087.02-1562.35	0.53
Manganese	NY	385	8.27	1.11	5.77-12.76	0.78
	WI	366	8.75	1.21	5.75-13.99	0.81
Molybdenum	NY	383	0.192	0.025	0.134-0.274	0.85
	WI	366	0.387	0.089	0.124-0.820	0.91
Nickel	NY	385	0.145	0.022	0.100-0.244	0.46
	WI	366	0.173	0.033	0.106-0.318	0.56
Phosphorus	NY	385	3137.29	106.04	2836.78-3457.84	0.58
	WI	366	3217.65	194.72	2727.60-3861.54	0.75
Potassium	NY	385	8023.6	349.3	6871.29-9373.28	0.59
	WI	366	8162.05	508.53	6789.78-9622.76	0.75
Rubidium	NY	385	2.99	0.142	2.63-3.62	0.58
	WI	366	2.48	0.173	2.14-3.26	0.34
Strontium	NY	383	0.257	0.022	0.207-0.373	0.35
	WI	366	0.297	0.072	0.167-0.679	0.64
Sulfur	NY	385	1452.77	32.42	1366.17-1583.87	0.17
	WI	366	1449.28	48.86	1310.84-1586.39	0.22
Zinc	NY	385	24.31	1.62	19.38-30.64	0.62
	WI	366	24.65	2.08	19.72-31.44	0.64
